# Supplementary material for: Sequential expression of putative stem cell markers in gastric carcinogenesis
Source: PubMed Central journal article supplement (PMC3188930; doi:10.1038/bjc.2011.287), 2011-08-09
Supplement: bjc2011287x1.pdf [file bjc2011287x1.pdf]

**Supplementary Table S1:** Co-relationships between putative stem cell marker expression and clinicopathologic features

| <i>Clinicopathologic features</i> | <i>CD44</i>           |                                |              | <i>Musashi-1</i>      |                                |              | <i>CD133</i>          |                                |    |
|-----------------------------------|-----------------------|--------------------------------|--------------|-----------------------|--------------------------------|--------------|-----------------------|--------------------------------|----|
|                                   | Analyzable tumour (N) | No. of positive expression (%) | P            | Analyzable tumour (N) | No. of positive expression (%) | P            | Analyzable tumour (N) | No. of positive expression (%) | p  |
| <b>Age</b>                        |                       |                                |              |                       |                                |              |                       |                                |    |
| <64                               | 43                    | 29 (67.4)                      | NS           | 42                    | 34 (81.0)                      | NS           | 43                    | 5 (11.6)                       | NS |
| >=64                              | 68                    | 46 (67.6)                      |              | 60                    | 49 (81.7)                      |              | 68                    | 14 (20.6)                      |    |
| <b>Ethnicity</b>                  |                       |                                |              |                       |                                |              |                       |                                |    |
| Chinese                           | 98                    | 65 (66.3)                      | <b>0.043</b> | 90                    | 73 (81.1)                      | NS           | 98                    | 18 (18.4)                      | NS |
| Non-Chinese                       | 12                    | 11 (91.7)                      |              | 11                    | 9 (81.8)                       |              | 12                    | 1 (8.3)                        |    |
| <b>Sex</b>                        |                       |                                |              |                       |                                |              |                       |                                |    |
| Female                            | 36                    | 27 (75.0)                      | NS           | 33                    | 27 (81.8)                      | NS           | 36                    | 5 (13.9)                       | NS |
| Male                              | 76                    | 48 (63.2)                      |              | 70                    | 57 (81.4)                      |              | 76                    | 14 (18.4)                      |    |
| <b>T</b>                          |                       |                                |              |                       |                                |              |                       |                                |    |
| T1-T2                             | 60                    | 42 (70.0)                      | NS           | 53                    | 38 (71.7)                      | <b>0.007</b> | 60                    | 10 (16.7)                      | NS |
| T3-T4                             | 52                    | 33 (63.5)                      |              | 50                    | 46 (92.0)                      |              | 52                    | 9 (17.3)                       |    |
| <b>N</b>                          |                       |                                |              |                       |                                |              |                       |                                |    |
| N0                                | 34                    | 22 (64.7)                      | NS           | 32                    | 23 (71.9)                      | NS           | 34                    | 7 (20.6)                       | NS |
| N1-N3                             | 77                    | 52 (67.5)                      |              | 38                    | 32 (84.2)                      |              | 77                    | 11 (14.3)                      |    |
| <b>M</b>                          |                       |                                |              |                       |                                |              |                       |                                |    |
| M0                                | 102                   | 68 (66.7)                      | NS           | 80                    | 64 (80.0)                      | NS           | 102                   | 17 (16.0)                      | NS |
| M1                                | 10                    | 7 (70.0)                       |              | 10                    | 9 (90.0)                       |              | 10                    | 2 (20.0)                       |    |
| <b>Stage</b>                      |                       |                                |              |                       |                                |              |                       |                                |    |
| I-II                              | 55                    | 38 (69.1)                      | NS           | 50                    | 37 (74.0)                      | <b>0.047</b> | 55                    | 9 (16.4)                       | NS |
| III -IV                           | 57                    | 37 (64.9)                      |              | 53                    | 47 (88.7)                      |              | 57                    | 10 (17.5)                      |    |
| <b>Tumour Grade</b>               |                       |                                |              |                       |                                |              |                       |                                |    |
| Well/moderate                     | 29                    | 16 (55.2)                      | <b>0.027</b> | 30                    | 23 (76.7)                      | NS           | 34                    | 8 (23.5)                       | NS |
| Poor/undifferentiated             | 78                    | 60 (76.9)                      |              | 70                    | 58 (82.3)                      |              | 74                    | 10 (13.5)                      |    |
| <b>Histological type</b>          |                       |                                |              |                       |                                |              |                       |                                |    |
| Diffuse                           | 54                    | 44 (81.5)                      | <b>0.016</b> | 52                    | 45 (86.5)                      | NS           | 55                    | 7 (12.7)                       | NS |
| Intestinal                        | 51                    | 31 (60.8)                      |              | 50                    | 38 (76.0)                      |              | 56                    | 12 (21.4)                      |    |
| <b>H.pylori Co-Infection</b>      |                       |                                |              |                       |                                |              |                       |                                |    |
| Negative                          | 28                    | 18 (64.3)                      | NS           | 75                    | 62 (82.7)                      | NS           | 81                    | 15 (18.5)                      | NS |
| Positive                          | 82                    | 55 (67.1)                      |              | 26                    | 21 (80.8)                      |              | 29                    | 4 (13.8)                       |    |
| <b>Perineural Invasion</b>        |                       |                                |              |                       |                                |              |                       |                                |    |
| No                                | 60                    | 39 (65.0)                      | NS           | 41                    | 35 (85.4)                      | NS           | 60                    | 7 (11.7)                       | NS |
| Yes                               | 52                    | 36 (69.2)                      |              | 50                    | 40 (80.0)                      |              | 52                    | 12 (23.1)                      |    |
| <b>Lymph node Invasion</b>        |                       |                                |              |                       |                                |              |                       |                                |    |
| No                                | 49                    | 34 (69.4)                      | NS           | 37                    | 29 (78.4)                      | NS           | 49                    | 8 (16.3)                       | NS |
| Yes                               | 63                    | 41 (65.1)                      |              | 60                    | 49 (81.7)                      |              | 63                    | 11 (17.5)                      |    |

NS: not significant
