# Supplementary material for: Sequential expression of putative stem cell markers in gastric carcinogenesis
Source: PubMed Central journal article supplement (PMC3188930; doi:10.1038/bjc.2011.287), 2011-08-09
Supplement: bjc2011287x2.pdf [file bjc2011287x2.pdf]

**Supplementary Table S2:** Clinicopathologic features of study cohort with neoadjuvant chemotherapy

| <i>Clinicopathologic features</i> | Cases (N) |
|-----------------------------------|-----------|
| <b>Age</b>                        |           |
| <55                               | 4         |
| >=55                              | 4         |
| <b>Ethnicity</b>                  |           |
| Chinese                           | 1         |
| Non-Chinese                       | 7         |
| <b>Sex</b>                        |           |
| Female                            | 2         |
| Male                              | 6         |
| <b>TNM Stage</b>                  |           |
| II                                | 3         |
| III                               | 5         |
| <b>Tumour Grade</b>               |           |
| Moderate                          | 1         |
| Poor                              | 7         |
| <b>Histological type</b>          |           |
| Diffuse                           | 6         |
| Intestinal                        | 2         |
| <b>Perineural Invasion</b>        |           |
| No                                | 5         |
| Yes                               | 3         |
| <b>Lymph node Invasion</b>        |           |
| No                                | 4         |
| Yes                               | 4         |
| <b>Pathological response</b>      |           |
| No                                | 4         |
| Yes                               | 4         |
