# Supplementary material for: Sequential expression of putative stem cell markers in gastric carcinogenesis
Source: PubMed Central journal article supplement (PMC3188930; doi:10.1038/bjc.2011.287), 2011-08-09
Supplement: bjc2011287x3.pdf [file bjc2011287x3.pdf]

**Supplementary Table S3:** Dilutions used and manufacturers' information for antibodies used in immunohistochemistry (IHC) staining

| <i>Tumour markers</i> | <b>Dilution for IHC</b> | <b>Clone</b> | <b>Manufacturer</b>              |
|-----------------------|-------------------------|--------------|----------------------------------|
| <b>CD44</b>           | 1:1000                  | SFF-304      | Bender MedSystems, San Diego, CA |
| <b>Musashi-1</b>      | 1:600                   | AB5977       | Millipore, Billerica, MA         |
| <b>CD133</b>          | 1:20                    | AC133        | MiltenyiBiotec, Auburn, CA       |
| <b>Ki67</b>           | 1:1000                  | ab15580      | Abcam, Cambridge, MA             |
| <b>PCNA</b>           | 1:1000                  | NCL-PCNA     | Novocasta, UK                    |
